# Supplementary material for: Relationship of Cultivated Grain Amaranth Species and Wild Relative Accessions
Source: MDPI journal article supplement (doi:10.3390/genes12121849), 2021-11-23
Supplement: s1 [file s1]

**Table S1.** Passport data of *Amaranthus* accessions from United States Department of Agriculture (USDA) used in this study.

| Entry No | Entry type | Accession No. | Species             | Origin Country | Origin Location | Name or Code       |
|----------|------------|---------------|---------------------|----------------|-----------------|--------------------|
| 1        | PI         | 553076        | <i>A. australis</i> | United States  | Florida         | Giant Amaranth     |
| 2        | PI         | 166045        | <i>A. caudatus</i>  | India          | n.a.            | Chua               |
| 3        | PI         | 175039        | <i>A. caudatus</i>  | India          | n.a.            | RRC 10             |
| 4        | PI         | 490440        | <i>A. caudatus</i>  | Peru           | n.a.            | LSK 19             |
| 5        | PI         | 490477        | <i>A. caudatus</i>  | Peru           | n.a.            | LSK 58             |
| 6        | PI         | 490491        | <i>A. caudatus</i>  | Argentina      | n.a.            | LSK 74             |
| 7        | PI         | 490579        | <i>A. caudatus</i>  | Bolivia        | n.a.            | LSK 355            |
| 8        | PI         | 490603        | <i>A. caudatus</i>  | Peru,          | Cajamarca       | LSK 398            |
| 9        | PI         | 490604        | <i>A. caudatus</i>  | Bolivia,       | Chuquisaca      | HH 50              |
| 10       | PI         | 490607        | <i>A. caudatus</i>  | Bolivia,       | Chuquisaca      | HH 54              |
| 11       | PI         | 490609        | <i>A. caudatus</i>  | Ecuador,       | Azuay           | HH 66              |
| 12       | PI         | 511679        | <i>A. caudatus</i>  | Argentina      | n.a.            | RRC 551            |
| 13       | PI         | 511681        | <i>A. caudatus</i>  | Bolivia        | n.a.            | Coimi              |
| 14       | PI         | 511685        | <i>A. caudatus</i>  | Peru           | n.a.            | HH 19              |
| 15       | PI         | 511687        | <i>A. caudatus</i>  | Peru           | n.a.            | HH 21              |
| 16       | PI         | 511688        | <i>A. caudatus</i>  | Peru           | n.a.            | Achita             |
| 17       | PI         | 511689        | <i>A. caudatus</i>  | Peru           | n.a.            | Achita             |
| 18       | PI         | 511691        | <i>A. caudatus</i>  | Peru           | n.a.            | Achita             |
| 19       | PI         | 511693        | <i>A. caudatus</i>  | Peru           | n.a.            | Achita             |
| 20       | PI         | 511694        | <i>A. caudatus</i>  | Peru           | n.a.            | RRC 572            |
| 21       | PI         | 511698        | <i>A. caudatus</i>  | Peru           | n.a.            | HH 37              |
| 22       | PI         | 511700        | <i>A. caudatus</i>  | Peru           | n.a.            | Achis jonjoli      |
| 23       | PI         | 511701        | <i>A. caudatus</i>  | Peru           | n.a.            | Achis jonjoli      |
| 24       | PI         | 511703        | <i>A. caudatus</i>  | Peru           | n.a.            | Coyo               |
| 25       | PI         | 511704        | <i>A. caudatus</i>  | Peru,          | Cajamarca       | Coyo               |
| 26       | PI         | 553073        | <i>A. caudatus</i>  | United States  | New Jersey      | Love-lies bleeding |
| 27       | PI         | 568132        | <i>A. caudatus</i>  | Bolivia,       | Tarija          | coime              |
| 28       | PI         | 568147        | <i>A. caudatus</i>  | Bolivia,       | Tarija          | coime              |
| 29       | PI         | 608019        | <i>A. caudatus</i>  | Ecuador,       | Pichincha       | HH75               |
| 30       | PI         | 634914        | <i>A. caudatus</i>  | Pakistan,      | Kashmir         | RRC 1395           |
| 31       | PI         | 642736        | <i>A. caudatus</i>  | United States  | California      | RRC 379            |
| 32       | PI         | 642741        | <i>A. caudatus</i>  | Bolivia        | n.a.            | Cscar Blanco       |
| 33       | PI         | 649224        | <i>A. caudatus</i>  | Peru,          | Ancash          | RRC899             |
| 34       | PI         | 669838        | <i>A. caudatus</i>  | Bolivia        | n.a.            | RRC 556            |
| 35       | Ames       | 30932         | <i>A. caudatus</i>  | Russia         | n.a.            | Red Utopia         |
| 36       | Ames       | 31991         | <i>A. cruentus</i>  | United States  | California      | Burgundy Amaranth  |
| 37       | PI         | 288278        | <i>A. cruentus</i>  | India          | n.a.            | RRS 31             |
| 38       | PI         | 433228        | <i>A. cruentus</i>  | Guatemala      | Chimaltenango   | 2                  |
| 39       | PI         | 451711        | <i>A. cruentus</i>  | Mexico         | n.a.            | GN 1144            |
| 40       | PI         | 451825        | <i>A. cruentus</i>  | Guatemala,     | Chimaltenango   | Cr 045             |

|    |    |        |                    |               |               |                   |
|----|----|--------|--------------------|---------------|---------------|-------------------|
| 41 | PI | 462371 | <i>A. cruentus</i> | Sudan         | n.a.          | CN110             |
| 42 | PI | 477912 | <i>A. cruentus</i> | Mexico        | n.a.          | RRC 416           |
| 43 | PI | 477913 | <i>A. cruentus</i> | Mexico        | n.a.          | RRC 1011          |
| 44 | PI | 477914 | <i>A. cruentus</i> | Mexico        | n.a.          | RRC 1041          |
| 45 | PI | 482049 | <i>A. cruentus</i> | Zimbabwe      | n.a.          | TGR 542           |
| 46 | PI | 482051 | <i>A. cruentus</i> | Zimbabwe      | n.a.          | TGR 603           |
| 47 | PI | 490655 | <i>A. cruentus</i> | Peru          | n.a.          | RRC 1121          |
| 48 | PI | 490662 | <i>A. cruentus</i> | Benin         | n.a.          | RRC 1034          |
| 49 | PI | 494771 | <i>A. cruentus</i> | Zambia        | n.a.          | ZFA 3330          |
| 50 | PI | 494777 | <i>A. cruentus</i> | Zambia        | n.a.          | ZFA 3653          |
| 51 | PI | 500264 | <i>A. cruentus</i> | Zambia        | n.a.          | ZM 2255           |
| 52 | PI | 500267 | <i>A. cruentus</i> | Zambia        | n.a.          | ZM 2309           |
| 53 | PI | 511715 | <i>A. cruentus</i> | Guatemala     | RRC           | 618               |
| 54 | PI | 511717 | <i>A. cruentus</i> | Guatemala     | HH            | 85                |
| 55 | PI | 511718 | <i>A. cruentus</i> | Guatemala     | HH            | 86                |
| 56 | PI | 511719 | <i>A. cruentus</i> | Guatemala     | n.a.          | Niqua, alegria    |
| 57 | PI | 511726 | <i>A. cruentus</i> | Mexico        | n.a.          | HH 99             |
| 58 | PI | 511727 | <i>A. cruentus</i> | Mexico        | n.a.          | HH 100            |
| 59 | PI | 511732 | <i>A. cruentus</i> | Guatemala     | n.a.          | HH 106            |
| 60 | PI | 511876 | <i>A. cruentus</i> | Mexico        | n.a.          | Huatle            |
| 61 | PI | 515959 | <i>A. cruentus</i> | U.S.          | Montana       | Montana-3         |
| 62 | PI | 527567 | <i>A. cruentus</i> | Burundi       | n.a.          | IZ 32             |
| 63 | PI | 527570 | <i>A. cruentus</i> | Rwanda        | n.a.          | IZ 166            |
| 64 | PI | 536437 | <i>A. cruentus</i> | Maldives      | n.a.          | KLM 1863          |
| 65 | PI | 538320 | <i>A. cruentus</i> | U.S.          | Pennsylvania  | K 283             |
| 66 | PI | 538321 | <i>A. cruentus</i> | U.S.          | Pennsylvania  | K 436             |
| 67 | PI | 566896 | <i>A. cruentus</i> | United States | Arizona       | RRC 537           |
| 68 | PI | 566897 | <i>A. cruentus</i> | India,        | Kerala        | Kerala Red        |
| 69 | PI | 566898 | <i>A. cruentus</i> | Mexico        | n.a.          | RRC 362           |
| 70 | PI | 576447 | <i>A. cruentus</i> | Nigeria,      | Oyo           | Unidentified      |
| 71 | PI | 576451 | <i>A. cruentus</i> | Nigeria,      | Oyo           | ED82/1029A        |
| 72 | PI | 576456 | <i>A. cruentus</i> | Nigeria,      | Oyo           | NHA/9A            |
| 73 | PI | 576457 | <i>A. cruentus</i> | Nigeria,      | Oyo           | NHA/13A/          |
| 74 | PI | 576462 | <i>A. cruentus</i> | Nigeria       | n.a.          | TB 81/790B        |
| 75 | PI | 576466 | <i>A. cruentus</i> | Nigeria,      | Oyo           | NHA/30A           |
| 76 | PI | 576477 | <i>A. cruentus</i> | Nigeria       | n.a.          | TE 81/27A         |
| 77 | PI | 578280 | <i>A. cruentus</i> | Nigeria,      | Oyo           | NHA/15            |
| 78 | PI | 590992 | <i>A. cruentus</i> | China         | Tibet         | n.a.              |
| 79 | PI | 604555 | <i>A. cruentus</i> | Mexico,       | Morelos       | Mapes 818         |
| 80 | PI | 604556 | <i>A. cruentus</i> | Mexico,       | Morelos       | Mapes 819         |
| 81 | PI | 604666 | <i>A. cruentus</i> | United States | Pennsylvania  | RRC 1027          |
| 82 | PI | 605353 | <i>A. cruentus</i> | China         | RRC           | 5445              |
| 83 | PI | 605354 | <i>A. cruentus</i> | United States | Pennsylvania  | K 112             |
| 84 | PI | 606767 | <i>A. cruentus</i> | United States | Pennsylvania  | K 277             |
| 85 | PI | 606798 | <i>A. cruentus</i> | Mexico,       | Mexico        | RRC 1032          |
| 86 | PI | 607532 | <i>A. cruentus</i> | Netherlands,  | South Holland | Split Personality |
| 87 | PI | 612170 | <i>A. cruentus</i> | China,        | Hubei         | V67               |
| 88 | PI | 618962 | <i>A. cruentus</i> | Benin         | n.a.          | RRC 67            |

|     |    |        |                    |               |                     |                      |
|-----|----|--------|--------------------|---------------|---------------------|----------------------|
| 89  | PI | 628780 | <i>A. cruentus</i> | Mexico,       | Morelos             | RRC 423              |
| 90  | PI | 628781 | <i>A. cruentus</i> | Mexico,       | Morelos             | RRC 444              |
| 91  | PI | 628782 | <i>A. cruentus</i> | Mexico,       | Morelos             | RRC 446              |
| 92  | PI | 628783 | <i>A. cruentus</i> | Mexico,       | Morelos             | RRC 776              |
| 93  | PI | 628784 | <i>A. cruentus</i> | Mexico,       | Puebla              | RRC 1139             |
| 94  | PI | 628785 | <i>A. cruentus</i> | Mexico,       | Puebla              | RRC1140              |
| 95  | PI | 628793 | <i>A. cruentus</i> | Zaire,        | Shaba               | RRC 685              |
| 96  | PI | 633584 | <i>A. cruentus</i> | China,        | Beijing             | RRC 27               |
| 97  | PI | 633585 | <i>A. cruentus</i> | Guatemala,    | Chimaltenan<br>go   | RRC 624              |
| 98  | PI | 633592 | <i>A. cruentus</i> | Mexica,       | Colima              | RRC 1191             |
| 99  | PI | 641043 | <i>A. cruentus</i> | Nigeria,      | Oyo                 | CEN/IB/97/AMA0<br>03 |
| 100 | PI | 641045 | <i>A. cruentus</i> | Nigeria,      | Oyo                 | CEN/IB/97/AMA0<br>05 |
| 101 | PI | 642734 | <i>A. cruentus</i> | Mexico        | n.a.                | RRC 1012             |
| 102 | PI | 642742 | <i>A. cruentus</i> | United States | Pennsylvania        | K 459                |
| 103 | PI | 643037 | <i>A. cruentus</i> | Mexico,       | Federal<br>district | RRC 413              |
| 104 | PI | 643039 | <i>A. cruentus</i> | Mexico,       | Morelos             | RRC 415              |
| 105 | PI | 673040 | <i>A. cruentus</i> | Mexico,       | Morelos             | RRC 417              |
| 106 | PI | 643042 | <i>A. cruentus</i> | Mexico,       | Morelos             | RRC 419              |
| 107 | PI | 643043 | <i>A. cruentus</i> | Mexico,       | Morelos             | RRC 420              |
| 108 | PI | 643044 | <i>A. cruentus</i> | Mexico,       | Morelos             | RRC 421              |
| 109 | PI | 643045 | <i>A. cruentus</i> | Mexico,       | Morelos             | RRC 422              |
| 110 | PI | 643046 | <i>A. cruentus</i> | Mexico,       | Morelos             | RRC 424              |
| 111 | PI | 643047 | <i>A. cruentus</i> | Mexico,       | Morelos             | RRC 425              |
| 112 | PI | 643048 | <i>A. cruentus</i> | Mexico,       | Morelos             | RRC 426              |
| 113 | PI | 643049 | <i>A. cruentus</i> | Mexico,       | Morelos             | RRC 428              |
| 114 | PI | 643051 | <i>A. cruentus</i> | Mexico,       | Morelos             | RRC 430              |
| 115 | PI | 643052 | <i>A. cruentus</i> | Mexico,       | Morelos             | RRC 431              |
| 116 | PI | 643053 | <i>A. cruentus</i> | Mexico,       | Morelos             | RRC 432              |
| 117 | PI | 643054 | <i>A. cruentus</i> | Mexico,       | Morelos             | RRC 433              |
| 118 | PI | 643055 | <i>A. cruentus</i> | Mexico,       | Morelos             | RRC 434              |
| 119 | PI | 643056 | <i>A. cruentus</i> | Mexico,       | Morelos             | RRC 435              |
| 120 | PI | 643057 | <i>A. cruentus</i> | Mexico,       | Morelos             | RRC 436              |
| 121 | PI | 643060 | <i>A. cruentus</i> | Mexico,       | Morelos             | RRC 441              |
| 122 | PI | 643062 | <i>A. cruentus</i> | Mexico,       | Morelos             | RRC 443              |
| 123 | PI | 643064 | <i>A. cruentus</i> | Mexico,       | Morelos             | RRC 447              |
| 124 | PI | 643077 | <i>A. cruentus</i> | Mexico,       | Morelos             | RRC 463              |
| 125 | PI | 643078 | <i>A. cruentus</i> | Mexico,       | Oxaca               | RRC 464              |
| 126 | PI | 647848 | <i>A. cruentus</i> | United States | California          | RRC 548              |
| 127 | PI | 649506 | <i>A. cruentus</i> | Mexico,       | Tlaxcala            | RRC 483              |
| 128 | PI | 649408 | <i>A. cruentus</i> | Mexico,       | Tlaxcala            | RRC 491              |
| 129 | PI | 649511 | <i>A. cruentus</i> | Mexico,       | Tlaxcala            | RRC 499              |
| 130 | PI | 649512 | <i>A. cruentus</i> | Mexico,       | Tlaxcala            | RRC 500              |
| 131 | PI | 649513 | <i>A. cruentus</i> | Mexico,       | Tlaxcala            | RRC 501              |
| 132 | PI | 649514 | <i>A. cruentus</i> | Mexico,       | Tlaxcala            | RRC 506              |
| 133 | PI | 649515 | <i>A. cruentus</i> | Mexico,       | Puebla              | RRC 733              |

|     |    |        |                    |                    |                  |                   |
|-----|----|--------|--------------------|--------------------|------------------|-------------------|
| 134 | PI | 649516 | <i>A. cruentus</i> | Mexico,            | Puebla           | RRC 734           |
| 135 | PI | 649517 | <i>A. cruentus</i> | Mexico,            | Puebla           | RRC 735           |
| 136 | PI | 649519 | <i>A. cruentus</i> | Mexico,            | Puebla           | RRC 737           |
| 137 | PI | 649520 | <i>A. cruentus</i> | Mexico,            | Puebla           | RRC 738           |
| 138 | PI | 649521 | <i>A. cruentus</i> | Mexico,            | Morelos          | RRC 768           |
| 139 | PI | 649522 | <i>A. cruentus</i> | Mexico,            | Morelos          | RRC 770           |
| 140 | PI | 649523 | <i>A. cruentus</i> | Mexico,            | Morelos          | RRC 771           |
| 141 | PI | 649524 | <i>A. cruentus</i> | Mexico,            | Morelos          | RRC 772           |
| 142 | PI | 649525 | <i>A. cruentus</i> | Mexico,            | Morelos          | RRC 773           |
| 143 | PI | 649526 | <i>A. cruentus</i> | Mexico,            | Morelos          | RRC 779           |
| 144 | PI | 649527 | <i>A. cruentus</i> | Mexico,            | Morelos          | RRC 781           |
| 145 | PI | 649528 | <i>A. cruentus</i> | Mexico,            | Puebla           | RRC782            |
| 146 | PI | 649603 | <i>A. cruentus</i> | Mexico,            | Puebla           | RRC743            |
| 147 | PI | 649609 | <i>A. cruentus</i> | Mexico,            | Federal district | RRC 774           |
| 148 | PI | 649612 | <i>A. cruentus</i> | Mexico,            | Morelos          | RRC 778           |
| 149 | PI | 658727 | <i>A. cruentus</i> | Guatemala          | n.a.             | RRC 384           |
| 150 | PI | 658729 | <i>A. cruentus</i> | Cen. Afr. Republic | n.a.             | RRC 844           |
| 151 | PI | 658731 | <i>A. cruentus</i> | United States      | Iowa             | Y-004-W           |
| 152 | PI | 664489 | <i>A. cruentus</i> | Mexico,            | Puebla           | DB 2010884        |
| 153 | PI | 665285 | <i>A. cruentus</i> | Venezuela,         | Falcon           | RRC 1265          |
| 154 | PI | 665286 | <i>A. cruentus</i> | Venezuala          | n.a.             | RRC1266           |
| 155 | PI | 667160 | <i>A. cruentus</i> | Guatemala          | n.a.             | RRC 626           |
| 156 | PI | 669937 | <i>A. cruentus</i> | Tanzania           | n.a.             | RRC 25            |
| 157 | PI | 669938 | <i>A. cruentus</i> | Tanzania           | n.a.             | RRC 56            |
| 158 | PI | 511684 | <i>A. hybridus</i> | Peru               | n.a.             | Quihuicha         |
| 159 | PI | 511733 | <i>A. hybridus</i> | Peru               | n.a.             | HH 48             |
| 160 | PI | 511734 | <i>A. hybridus</i> | Bolivia,           | Chuquisaca       | HH 52             |
| 161 | PI | 511735 | <i>A. hybridus</i> | Bolivia            | n.a.             | HH 53             |
| 162 | PI | 568179 | <i>A. hybridus</i> | United States      | Iowa             | Ames 12991        |
| 163 | PI | 572255 | <i>A. hybridus</i> | United States      | California       | Aberrant Amaranth |
| 164 | PI | 608791 | <i>A. hybridus</i> | United States      | California       | RRC 382           |
| 165 | PI | 669835 | <i>A. hybridus</i> | Argentina          | n.a.             | RRC 550           |
| 166 | PI | 490489 | <i>A. hybridus</i> | Peru               | n.a.             | RRC 1119          |
| 167 | PI | 490682 | <i>A. hybridus</i> | Ecuador            | n.a.             | LSK 173           |
| 168 | PI | 490694 | <i>A. hybridus</i> | Ecuador            | n.a.             | LSK 186           |
| 169 | PI | 500249 | <i>A. hybridus</i> | Zambia             | n.a.             | ZM 1845           |
| 170 | PI | 511724 | <i>A. hybridus</i> | Mexico             | n.a.             | HH 96             |
| 171 | PI | 603889 | <i>A. hybridus</i> | United States      | Ohio             | Pop 42            |
| 172 | PI | 603895 | <i>A. hybridus</i> | United States      | Indiana          | Pop 48            |
| 173 | PI | 604568 | <i>A. hybridus</i> | Mexico,            | Puebla           | Mapes 831         |
| 174 | PI | 604602 | <i>A. hybridus</i> | Mexico,            | Puebla           | Basurto 1614      |
| 175 | PI | 604673 | <i>A. hybridus</i> | United States      | Virginia         | Ames 14358        |
| 176 | PI | 605351 | <i>A. hybridus</i> | Greece             | n.a.             | RRC 847           |
| 177 | PI | 632247 | <i>A. hybridus</i> | United States      | North Carolina   | DB 200128         |
| 178 | PI | 636178 | <i>A. hybridus</i> | United States      | Indiana          | RRC 100B          |

|     |      |        |                           |               |              |             |
|-----|------|--------|---------------------------|---------------|--------------|-------------|
| 179 | PI   | 636180 | <i>A. hybridus</i>        | Colombia,     | Cundinamarca | RRC 1153    |
| 180 | PI   | 636181 | <i>A. hybridus</i>        | United States | Delaware     | RRC 1195    |
| 181 | PI   | 652416 | <i>A. hybridus</i>        | Brazil,       | Goiás        | CPAC96-1    |
| 182 | PI   | 667156 | <i>A. hybridus</i>        | Ecuador       | n.a.         | RRC 610     |
| 183 | PI   | 667158 | <i>A. hybridus</i>        | Guatemala     | n.a.         | RRC 616     |
| 184 | PI   | 669837 | <i>A. hybridus</i>        | Bolivia,      | Tarija       | RRC 553     |
| 185 | Ames | 5666   | <i>A. hypochondriacus</i> | India         | n.a.         | RRC 1193    |
| 186 | Ames | 5667   | <i>A. hypochondriacus</i> | India,        | U.P          | RRC 1194    |
| 187 | PI   | 210995 | <i>A. hypochondriacus</i> | Afganistan    | n.a.         | RRC 79      |
| 188 | PI   | 274276 | <i>A. hypochondriacus</i> | India,        | Punjab       | AVRDC 74-38 |
| 189 | PI   | 274279 | <i>A. hypochondriacus</i> | India,        | H.P          | RRC 171     |
| 190 | PI   | 337611 | <i>A. hypochondriacus</i> | Uganda        | n.a.         | P 373       |
| 191 | PI   | 477915 | <i>A. hypochondriacus</i> | India         | n.a.         | RRC 1008    |
| 192 | PI   | 477916 | <i>A. hypochondriacus</i> | Mexico        | n.a.         | RRC 1023    |
| 193 | PI   | 477917 | <i>A. hypochondriacus</i> | Mexico        | n.a.         | RRC 1024    |
| 194 | PI   | 480592 | <i>A. hypochondriacus</i> | India         | n.a.         | IC-38061-1  |
| 195 | PI   | 480608 | <i>A. hypochondriacus</i> | India         | n.a.         | IC-38087    |
| 196 | PI   | 480711 | <i>A. hypochondriacus</i> | India         | n.a.         | IC-38187    |
| 197 | PI   | 480755 | <i>A. hypochondriacus</i> | India         | n.a.         | IC-38221    |
| 198 | PI   | 480918 | <i>A. hypochondriacus</i> | India         | n.a.         | IC-38360    |
| 199 | PI   | 481023 | <i>A. hypochondriacus</i> | India         | n.a.         | IC-38527    |
| 200 | PI   | 481226 | <i>A. hypochondriacus</i> | India         | n.a.         | IC-42254-2  |
| 201 | PI   | 481134 | <i>A. hypochondriacus</i> | India         | n.a.         | IC-42255-5  |
| 202 | PI   | 490752 | <i>A. hypochondriacus</i> | Guatemala     | n.a.         | LSK 80      |
| 203 | PI   | 490758 | <i>A. hypochondriacus</i> | Mexico        | n.a.         | RRC 1023    |
| 204 | PI   | 511721 | <i>A. hypochondriacus</i> | Mexico        | n.a.         | HH 93       |
| 205 | PI   | 511731 | <i>A. hypochondriacus</i> | Mexico        | n.a.         | RRC 646     |

|     |    |        |                           |               |                  |               |
|-----|----|--------|---------------------------|---------------|------------------|---------------|
| 206 | PI | 511877 | <i>A. hypochondriacus</i> | Mexico        | n.a.             | Huatle        |
| 207 | PI | 540446 | <i>A. hypochondriacus</i> | Pakistan      | n.a.             | RRC 1004      |
| 208 | PI | 558499 | <i>A. hypochondriacus</i> | United States | Nebraska         | Plainsman     |
| 209 | PI | 568125 | <i>A. hypochondriacus</i> | United States | Iowa             | DB921         |
| 210 | PI | 576486 | <i>A. hypochondriacus</i> | United States | California       | UC126         |
| 211 | PI | 584523 | <i>A. hypochondriacus</i> | United States | Colorado         | Ames 21897    |
| 212 | PI | 599682 | <i>A. hypochondriacus</i> | Mexico,       | Sonora           | RRC 541       |
| 213 | PI | 604461 | <i>A. hypochondriacus</i> | Germany       | n.a.             | Elephant Head |
| 214 | PI | 604576 | <i>A. hypochondriacus</i> | Mexico,       | Puebla           | Mapes 841     |
| 215 | PI | 604577 | <i>A. hypochondriacus</i> | Mexico,       | Puebla           | Mapes 847     |
| 216 | PI | 604796 | <i>A. hypochondriacus</i> | Unknown       | n.a.             | RRC 147       |
| 217 | PI | 607534 | <i>A. hypochondriacus</i> | Netherlands,  | North Holland    | Pygmy Torch   |
| 218 | PI | 618585 | <i>A. hypochondriacus</i> | India,        | Kerala           | Ames 23941    |
| 219 | PI | 619237 | <i>A. hypochondriacus</i> | Nepal         | n.a.             | RRC 124       |
| 220 | PI | 619239 | <i>A. hypochondriacus</i> | Nepal         | n.a.             | RRC 138       |
| 221 | PI | 619259 | <i>A. hypochondriacus</i> | Nepal         | n.a.             | RRC 266       |
| 222 | PI | 619266 | <i>A. hypochondriacus</i> | Nepal         | n.a.             | RRC 283       |
| 223 | PI | 633589 | <i>A. hypochondriacus</i> | Mexico,       | Chihuahua        | GN 975        |
| 224 | PI | 643038 | <i>A. hypochondriacus</i> | Mexico,       | Federal district | RRC 414       |
| 225 | PI | 643041 | <i>A. hypochondriacus</i> | Mexico,       | Morelos          | RRC 418       |
| 226 | PI | 643068 | <i>A. hypochondriacus</i> | Mexico,       | Mexico           | RRC 452       |
| 227 | PI | 649305 | <i>A. hypochondriacus</i> | China,        | Heilongjiang     | HLJ-037       |
| 228 | PI | 649540 | <i>A. hypochondriacus</i> | Mexico,       | Tlaxaca          | RRC 510       |
| 229 | PI | 649579 | <i>A. hypochondriacus</i> | Mexico        | n.a.             | RRC 755       |
| 230 | PI | 649607 | <i>A. hypochondriacus</i> | Mexico,       | Morelos          | RRC 767       |

|     |    |        |                           |               |                  |               |
|-----|----|--------|---------------------------|---------------|------------------|---------------|
| 231 | PI | 652432 | <i>A. hypochondriacus</i> | Brazil,       | Federal district | CPAC96-18     |
| 232 | PI | 654430 | <i>A. hypochondriacus</i> | Nepal         | n.a.             | SP 124        |
| 233 | PI | 666334 | <i>A. hypochondriacus</i> | United States | Iowa             | DB2011434     |
| 234 | PI | 669856 | <i>A. hypochondriacus</i> | India,        | U.P              | UC125         |
| 235 | PI | 669887 | <i>A. hypochondriacus</i> | India,        | U.P              | UC175         |
| 236 | PI | 633586 | <i>A. palmeri</i>         | Senegal,      | Dakar            | RRC 654       |
| 237 | PI | 572257 | <i>A. powellii</i>        | Rwanda        | n.a.             | AMA 89/79     |
| 238 | PI | 572261 | <i>A. powellii</i>        | Germany       | n.a.             | AMA 57/81     |
| 239 | PI | 538793 | <i>A. powellii</i>        | Russia        | n.a.             | AJCO73        |
| 240 | PI | 572259 | <i>A. powellii</i>        | Slovakia      | n.a.             | AMA 69/79     |
| 241 | PI | 572260 | <i>A. powellii</i>        | France        | n.a.             | AMA 74/82     |
| 242 | PI | 604671 | <i>A. powellii</i>        | United States | Washington       | Ames14356     |
| 243 | PI | 490454 | <i>A. quitensis</i>       | Peru,         | Apurimac         | LSK 34        |
| 244 | PI | 490466 | <i>A. quitensis</i>       | Peru          | n.a.             | LSK 46        |
| 245 | PI | 490706 | <i>A. quitensis</i>       | Ecuador       | n.a.             | LSK 203       |
| 246 | PI | 490708 | <i>A. quitensis</i>       | Ecuador       | n.a.             | LSK 205       |
| 247 | PI | 511736 | <i>A. quitensis</i>       | Bolivia       | n.a.             | HH 55         |
| 248 | PI | 511743 | <i>A. quitensis</i>       | Ecuador       | n.a.             | HH 69         |
| 249 | PI | 511745 | <i>A. quitensis</i>       | Ecuador       | n.a.             | HH 71         |
| 250 | PI | 511747 | <i>A. quitensis</i>       | Ecuador       | n.a.             | HH 73         |
| 251 | PI | 511751 | <i>A. quitensis</i>       | Peru          | n.a.             | Yuyu colorado |
| 252 | PI | 568154 | <i>A. quitensis</i>       | Bolivia,      | Tarija           | aroma         |
| 253 | PI | 649246 | <i>A. quitensis</i>       | Peru,         | Ancash           | RRC 928       |
| 254 | PI | 652419 | <i>A. quitensis</i>       | Brazil,       | Goiás            | CPAC96-4      |
| 255 | PI | 652428 | <i>A. quitensis</i>       | Brazil,       | Federal district | CPAC96-14     |
| 256 | PI | 669830 | <i>A. quitensis</i>       | Ecuador       | n.a.             | RRC 596       |
| 257 | PI | 669836 | <i>A. quitensis</i>       | Argentina,    | Santa Fe         | RRC 552       |
| 258 | PI | 669839 | <i>A. quitensis</i>       | Peru          | n.a.             | RRC 560       |
| 259 | PI | 636366 | <i>A. retroflexus</i>     | Unknown       | n.a.             | RRC 112C      |
| 260 | PI | 649310 | <i>A. retroflexus</i>     | Mongolia      | n.a.             | E94193        |
