# Supplementary material for: Relationship of Cultivated Grain Amaranth Species and Wild Relative Accessions
Source: MDPI journal article supplement (doi:10.3390/genes12121849), 2021-11-23
Supplement: s1 [file s1]

**Table S2.** Passport data of *Amaranthus* accessions from Seed Savers' Exchange (SSE).

| S.No. | SSE     | Plant name                          |
|-------|---------|-------------------------------------|
| 1     | SSE 1   | R158                                |
| 2     | SSE 3   | Mayo Indian                         |
| 3     | SSE 4   | R1017                               |
| 4     | SSE 5   | R1011                               |
| 5     | SSE 104 | Kerala Red                          |
| 6     | SSE 108 | Tunisian                            |
| 7     | SSE 112 | Jamaican Calalu                     |
| 8     | SSE 115 | Kahlula                             |
| 9     | SSE 119 | Black Leaved                        |
| 10    | SSE 132 | Kellerman                           |
| 11    | SSE 15  | Oeshburg                            |
| 12    | SSE 22  | Prince's Feather                    |
| 13    | SSE 24  | Hopi Red Dye                        |
| 14    | SSE 29  | Rodale 127                          |
| 15    | SSE 30  | Rodale 124                          |
| 16    | SSE 31  | Rodale 152                          |
| 17    | SSE 34  | Rodale R125                         |
| 18    | SSE 35  | Rodale R158                         |
| 19    | SSE 38  | Rodale 156                          |
| 20    | SSE 39  | <i>A. hypochondriacus</i> , unknown |
| 21    | SSE 6   | San Martin                          |
| 22    | SSE 7   | Golden Giant                        |
| 23    | SSE 79  | M. Dreadicus                        |
| 24    | SSE 80  | <i>A. dedos</i> , unknown           |
| 25    | SSE 86  | Black Seed                          |
| 26    | SSE 92  | Roter Meier                         |
| 27    | SSE 93  | Roland                              |
