# Supplementary material for: Relationship of Cultivated Grain Amaranth Species and Wild Relative Accessions
Source: MDPI journal article supplement (doi:10.3390/genes12121849), 2021-11-23
Supplement: s1 [file s1]

**Table S3.** Pairwise  $F_{ST}$  values among groups of *Amaranthus* accessions of different geographical origin.

| Region          | Asia  | South America | North America | Europe | Central America | Africa | unknown |
|-----------------|-------|---------------|---------------|--------|-----------------|--------|---------|
| Asia            | 0.000 |               |               |        |                 |        |         |
| South America   | 0.647 | 0.000         |               |        |                 |        |         |
| North America   | 0.710 | 0.081         | 0.000         |        |                 |        |         |
| Europe          | 0.721 | 0.060         | 0.000         | 0.000  |                 |        |         |
| Central America | 0.483 | 0.157         | 0.159         | 0.136  | 0.000           |        |         |
| Africa          | 0.230 | 0.323         | 0.337         | 0.286  | 0.185           | 0.000  |         |
| unknown         | 0.705 | 0.446         | 0.576         | 0.516  | 0.280           | 0.188  | 0.000   |
